# Supplementary material for: The Dynamics of Incomplete Lineage Sorting across the Ancient Adaptive Radiation of Neoavian Birds
Source: PLoS Biol. 2015 Aug 18;13(8):e1002224. doi: 10.1371/journal.pbio.1002224 (PMC4540587; doi:10.1371/journal.pbio.1002224)
Supplement: S2 Table — (XLS) [file pbio.1002224.s008.xls]

## Sheet: S2_Table
S2 Table. Per-branch levels of ILS and RE insertion rates across neoavian internodes of the main tree from Jarvis et al. [4].
	root to 1	1 to 2	2 to tina	2 to stru	1 to 3	3 to 4	4 to anas	4 to 5	5 to gall	5 to mele	3 to 6	6 to 7	7 to 8	8 to phoe	8 to podi	7 to 9	9 to colu	9 to 10	10 to pter	10 to mesi	6 to 11	11 to 12	12 to 13	13 to cucu	13 to 14	14 to taur	14 to chla	12 to 15	15 to capr	15 to 16	16 to chae	16 to caly	11 to 17	17 to 18	18 to opis	18 to 19	19 to char	19 to bale	17 to 20	20 to 21	21 to 22	22 to phae	22 to eury	21 to 23	23 to gavi	23 to 24	24 to 25	25 to fulm	25 to 26
Branch length in MY												1.0721				2.5132		3.9961			1.244	1.2111	1.8403		2.6418			3.7987					1.2148	0.806		1.3532			1.2911	0.9182	4.5043			1.7245		1.4487	1.3657
Total RE insertions												5				2		8			97	4	6		7			8					40	0		0			18	9	20			20		334	212
ILS-affected RE insertions												2				1		0			91	4	3		0			0					40	0		0			17	4	0			4		107	0
Percent ILS												40				50		n/a			93.8144	100	50		n/a			0					100	100		100			94.4444	44.4444	n/a			20		32.0359	0
Insertions per MY												4.66374				0.795798		2.00195			77.9743	3.30278	3.26034		2.64971			2.10598					32.9272	0		0			13.9416	9.80179	4.4402			11.5976		230.552	155.232
Note: Percent ILS could not be determined for internodes leading to only two terminal taxa. Insertion rates could not be determined for internodes where only a subset of markers where recorded. All these instances are marked with "n/a".
	Jarvis et al. (4) main tree
	+--tina
	+-----------------------------------------------------------------------------------------------------------------------------------------2
	! +--stru
	!
	! +-----anas
	! +--------------------------------------------------------------------------------------------------------------------------------4
	! ! ! +--gall
	--1 ! +--5
	! ! +--mele
	! !
	! ! +--phoe
	! ! +--------8
	! ! ! +--podi
	! ! +-----------------------------------------------------------------------------------------------------------------7
	+-----3 ! ! +-----colu
	! ! +-----9
	! ! ! +--pter
	! ! +-10
	! ! +--mesi
	! !
	! ! +-----cucu
	! ! +-------13
	! ! ! ! +--taur
	+--------6 ! +-14
	! +----------------------------------------------------------------------------------------------12 +--chla
	! ! !
	! ! ! +-----capr
	! ! +-------15
	! ! ! +--chae
	! ! +-16
	! ! +--caly
	! !
	! ! +-----opis
	! ! +-------------------------------------------------------------------------------------18
	+-------------11 ! ! +--char
	! ! +-19
	! ! +--bale
	! !
	! ! +--phae
	! ! +----------------------22
	! ! ! +--eury
	! ! !
	! ! +-------------------------------------------------------21 +--------------------gavi
	! ! ! ! !
	+----------------17 ! ! ! +-----fulm
	! ! +----23 +----------25
	! ! ! ! ! +--pygo
	! ! ! ! +-26
	! ! +-24 +--apte
	! ! !
	! ! ! +--------phal
	! ! +-------27
	! ! ! +-----nipp
	! ! +-28
	! ! ! +--egre
	! ! +-29
	+-------20 +--pele
	!
	! +-----------------------cari
	! !
	! +----------------------------31 +--------------------falc
	! ! ! !
	! ! +-32 +--melo
	! ! ! +-------------34
	! ! ! ! +--nest
	! ! +-33
	! ! ! +-----------acan
	! ! +----35
	! ! ! +--------mana
	! ! +-36
	+----------------------------30 ! +-----corv
	! +-37
	! ! +--geos
	! +-38
	! +--taen
	!
	! +-----cath
	! +-------------------40
	! ! ! +--hala
	! ! +-41
	+-------------------------39 +--hall
	!
	! +-----------------tyto
	+-------42
	! +--------------coli
	+-43
	! +-----------lept
	+-44
	! +--------apal
	+-45
	! +-----buce
	+-46
	! +--pico
	+-47
	+--mero
[truncated: 46 more columns]
