# Supplementary material for: The Dynamics of Incomplete Lineage Sorting across the Ancient Adaptive Radiation of Neoavian Birds
Source: PLoS Biol. 2015 Aug 18;13(8):e1002224. doi: 10.1371/journal.pbio.1002224 (PMC4540587; doi:10.1371/journal.pbio.1002224)
Supplement: S4 Table — (XLS) [file pbio.1002224.s010.xls]

## Sheet: S4_Table
S4 Table. Per-chromosome distributions of retrotransposon markers including levels of ILS, marker density, and exon density in the taeGut2 assembly of the zebra finch genome.
	Chromosome	Length (bp)	RE markers	ILS-free RE markers	Marker density per Mb	Exon density (%)	ILS (%)
Macrochromosomes	1	118548696	301	189	2.53904	1.5	37.2
	1A	73657157	190	117	2.57952	1.8	38.4
	2	156412533	387	237	2.47423	1.3	38.8
	3	112617285	277	162	2.45966	1.7	41.5
	4	69780378	183	121	2.62251	1.6	33.9
	4A	20704505	49	28	2.36663	2.2	42.9
	5	62374962	121	82	1.93988	2.2	32.2
	6	36305782	53	37	1.45982	2.1	30.2
	7	39844632	63	51	1.58114	2.3	19
	8	27993427	40	26	1.42891	2.2	35
	9	27241186	39	32	1.43166	2.3	17.9
	10	20806668	25	20	1.20154	3.1	20
	11	21403021	39	26	1.82217	2.3	33.3
	12	21576510	27	23	1.25136	2.6	14.8
	All macrochromosomes	809266742	1794	1151	2.21682	1.8	35.8
Microchromosomes	1B	1083483	3	3	2.76885	4.4	0
	13	16962381	25	15	1.47385	2.5	40
	14	16419078	24	15	1.46171	3.5	37.5
	15	14428146	15	10	1.03963	3.7	33.3
	17	11648728	11	9	0.944309	3.8	18.2
	18	11201131	16	14	1.42843	4.1	12.5
	19	11587733	12	9	1.03558	3.9	25
	20	15652063	19	14	1.2139	2.9	26.3
	21	5979137	4	3	0.668993	4.4	25
	22_random	803674	1	1	N/A	N/A	N/A
	23	6196912	7	6	1.12959	4	14.3
	24	8021379	3	3	0.374001	2.9	0
	All microchromosomes	119180171	140	102	1.17469	3.6	27.1
Sex chromosomes	Z	72861351	114	75	1.56462	1.5	34.2
Unassigned		?	70	45	N/A	N/A	35.7
All chromosomes		1001308264	2048	1328	2.04532	2	35.2
Note: Microchromosomes have a significantly lower level of ILS than macrochromosomes (t test, P = 0.0403), which is unexpected given the high recombination rates of microchromosomes (34-37) and the expected higher Ne. This is may be the effect of low sample size of RE markers per microchromosome due to their significantly lower RE marker density (t test, P = 0.0055). However, their significantly …
